# Supplementary material for: Human Exposure to Naturally Occurring Bacillus anthracis in the Kars Region of Eastern Türkiye
Source: MDPI journal article supplement (doi:10.3390/microorganisms12010167), 2024-01-14
Supplement: s1 [file s1]

## Supplementary Tables

**Table S1: Descriptive statistics of characteristics of study participants**

Descriptive statistics are shown for two groups of participants: (1) with known previous anthrax infection, (2) with no history of anthrax infection. Where count data are used, the number of participants is given with the percentage of the parent population. Where data are continuous, the mean ( $\mu$ ) is given with the standard deviation. [n/a = not applicable].

| Parameter                         |                       | Total                       | Confirmed previous anthrax infection | No history of anthrax infection |
|-----------------------------------|-----------------------|-----------------------------|--------------------------------------|---------------------------------|
| Anthrax infection history         |                       | $n = 279$                   | $n = 105$ (37.6%)                    | $n = 174$ (62.4%)               |
| Time from diagnosis [y]           |                       | $n/a$                       | $\mu = 4.6$ ( $\pm 4.8$ )            | $n/a$                           |
| Age [y]                           |                       | $\mu = 38.7$ ( $\pm 12.2$ ) | $\mu = 43.9$ ( $\pm 14.3$ )          | $\mu = 35.6$ ( $\pm 9.5$ )      |
| Time in at risk occupation [y]    |                       | $\mu = 28.2$ ( $\pm 18.4$ ) | $\mu = 41.5$ ( $\pm 16.1$ )          | $\mu = 20.2$ ( $\pm 14.7$ )     |
| Altitude [m]                      |                       | $\mu = 1817$ ( $\pm 122$ )  | $\mu = 1846$ ( $\pm 143$ )           | $\mu = 1800$ ( $\pm 104$ )      |
| Population of home settlement     |                       | $\mu = 32K$ ( $\pm 37K$ )   | $\mu = 18K$ ( $\pm 0.1K$ )           | $\mu = 41K$ ( $\pm 38K$ )       |
| Gender                            | Male                  | $n = 236$ (84.6%)           | $n = 86$ (81.9%)                     | $n = 150$ (86.2%)               |
|                                   | Female                | $n = 43$ (15.4%)            | $n = 19$ (18.1%)                     | $n = 24$ (13.8%)                |
| Known contact event               |                       | $n = 76$ (27.2%)            | $n = 4$ (3.8%)                       | $n = 72$ (41.4%)                |
| Time since contact event [y]      |                       | $\mu = 3.6$ ( $\pm 2.3$ )   | $\mu = 3.2$ ( $\pm 0.8$ )            | $\mu = 3.6$ ( $\pm 2.4$ )       |
| Continuous risk of spore exposure |                       | $n = 11$ (3.9%)             | $n = 4$ (3.8%)                       | $n = 7$ (4%)                    |
| Duration of Continuous risk [y]   |                       | $\mu = 23.1$ ( $\pm 8$ )    | $\mu = 25$ ( $\pm 12.9$ )            | $\mu = 22$ ( $\pm 4.6$ )        |
| Occupation group                  | Butcher               | $n = 48$ (17.2%)            | $n = 13$ (12.4%)                     | $n = 35$ (20.1%)                |
|                                   | Lab staff             | $n = 12$ (4.3%)             | $n = 0$                              | $n = 12$ (6.9%)                 |
|                                   | Leather worker        | $n = 5$ (1.8%)              | $n = 1$ (1%)                         | $n = 4$ (2.3%)                  |
|                                   | Shepherd              | $n = 29$ (10.4%)            | $n = 0$                              | $n = 29$ (16.7%)                |
|                                   | Urban dweller         | $n = 31$ (11.1%)            | $n = 13$ (12.4%)                     | $n = 18$ (10.3%)                |
|                                   | Veterinarian          | $n = 46$ (16.5%)            | $n = 1$ (1%)                         | $n = 45$ (25.9%)                |
|                                   | Rural dweller         | $n = 108$ (38.7%)           | $n = 77$ (73.3%)                     | $n = 31$ (17.8%)                |
| Home district                     | Arpaçay               | $n = 26$ (9.3%)             | $n = 11$ (10.5%)                     | $n = 15$ (8.6%)                 |
|                                   | Digor                 | $n = 7$ (2.5%)              | $n = 0$                              | $n = 7$ (4%)                    |
|                                   | Kars central          | $n = 193$ (69.2%)           | $n = 72$ (68.6%)                     | $n = 121$ (69.5%)               |
|                                   | Sarıkamış             | $n = 24$ (8.6%)             | $n = 14$ (13.3%)                     | $n = 10$ (5.7%)                 |
|                                   | Selim                 | $n = 13$ (4.7%)             | $n = 2$ (1.9%)                       | $n = 11$ (6.3%)                 |
|                                   | Susuz                 | $n = 16$ (5.7%)             | $n = 6$ (5.7%)                       | $n = 10$ (5.7%)                 |
| Residence category                | City                  | $n = 110$ (39.4%)           | $n = 22$ (21%)                       | $n = 88$ (50.6%)                |
|                                   | Town                  | $n = 42$ (15.1%)            | $n = 6$ (5.7%)                       | $n = 36$ (20.7%)                |
|                                   | Village               | $n = 127$ (45.5%)           | $n = 77$ (73.3%)                     | $n = 50$ (28.7%)                |
| Site of infection                 | Face                  | $n/a$                       | $n = 6$ (5.7%)                       | $n/a$                           |
|                                   | Digits                | $n/a$                       | $n = 33$ (31.4%)                     | $n/a$                           |
|                                   | Hand                  | $n/a$                       | $n = 21$ (20%)                       | $n/a$                           |
|                                   | Wrist                 | $n/a$                       | $n = 15$ (14.3%)                     | $n/a$                           |
|                                   | Arm                   | $n/a$                       | $n = 18$ (17.1%)                     | $n/a$                           |
|                                   | Unspecified cutaneous | $n/a$                       | $n = 7$ (6.7%)                       | $n/a$                           |
|                                   | GI tract              | $n/a$                       | $n = 5$ (4.8%)                       | $n/a$                           |

**Table S2: Substitutions in the dataset**

| Variable                     | Missing data type     | Number of missing values | Substituted value |
|------------------------------|-----------------------|--------------------------|-------------------|
| Age (y)                      | Missing data          | n = 2                    | Mean = 38.69      |
| Time in occupation (y)       | Missing data          | n = 2                    | Mean = 28.23      |
| Continuous risk duration (y) | Missing data          | n = 2                    | Mean = 23.11      |
| Time since infection (y)     | Missing data          | n = 4                    | Mean = 4.32       |
|                              | No recorded infection | n = 174                  | 30 (max + 5)      |
| Time since contact (y)       | Missing data          | n = 40                   | Mean = 3.60       |
|                              | No recorded contact   | n = 203                  | 20 (max + 5)      |

**Table S1: Coefficients indicated as likely predictors for anti-PA IgG concentration**

| Model                                    | Unstandardized Coefficients |            | Standardized Coefficients | t      | Sig. (p) |
|------------------------------------------|-----------------------------|------------|---------------------------|--------|----------|
|                                          | B                           | Std. Error | Beta                      |        |          |
| (Constant)                               | 0.843                       | 0.177      |                           | 4.774  | < 0.001  |
| Clinical infection                       | 0.806                       | 0.161      | 0.376                     | 4.998  | < 0.001  |
| Occupation=Veterinarian                  | -0.485                      | 0.143      | -0.173                    | -3.386 | 0.001    |
| Occupation=Shepherd                      | -0.522                      | 0.192      | -0.153                    | -2.724 | 0.007    |
| Administrative district=ARPAÇAY          | 0.414                       | 0.182      | 0.116                     | 2.269  | 0.024    |
| Log <sub>10</sub> (Time since infection) | -0.270                      | 0.109      | -0.180                    | -2.487 | 0.013    |
| Continuous risk duration [y]             | 0.022                       | 0.010      | 0.100                     | 2.274  | 0.024    |
| Occupation=Butcher                       | 0.413                       | 0.142      | 0.150                     | 2.904  | 0.004    |
| Residence category=Town                  | -0.367                      | 0.145      | -0.126                    | -2.526 | 0.012    |

**Table S2: Coefficients indicated as likely predictors for anti-LF IgG concentration**

| Model                             | Unstandardized Coefficients |            | Standardized Coefficients | t      | Sig. (p) |
|-----------------------------------|-----------------------------|------------|---------------------------|--------|----------|
|                                   | B                           | Std. Error | Beta                      |        |          |
| (Constant)                        | -169.059                    | 77.301     |                           | -2.187 | 0.030    |
| Clinical infection                | 0.641                       | 0.075      | 0.496                     | 8.563  | < 0.001  |
| Residence category=Village        | 0.257                       | 0.071      | 0.204                     | 3.624  | < 0.001  |
| Administrative district=SARIKAMIŞ | 0.455                       | 0.109      | 0.204                     | 4.166  | < 0.001  |
| Sample date                       | $1.25 \times 10^{-8}$       | 0.000      | 0.112                     | 2.194  | 0.029    |
| Infection site=Digits             | -0.217                      | 0.106      | -0.112                    | -2.047 | 0.042    |

**Table S3: Coefficients indicated as likely predictors for discriminant score optimised to identify previous infection in individuals with no history of infection**

| Model                        | Unstandardized Coefficients |            | Standardized Coefficients | t      | Sig. (p) |
|------------------------------|-----------------------------|------------|---------------------------|--------|----------|
|                              | B                           | Std. Error | Beta                      |        |          |
| (Constant)                   | −0.546                      | 0.062      |                           | −8.826 | < 0.001  |
| Occupation=Veterinarian      | −0.615                      | 0.120      | −0.357                    | −5.131 | < 0.001  |
| Continuous risk duration [y] | 0.037                       | 0.012      | 0.219                     | 3.144  | 0.002    |

**Table S4: Coefficients indicated as least likely predictors for discriminant score optimised to predict infection, using data from individuals with known previous infection**

| Model                          | Unstandardized Coefficients |            | Standardized Coefficients | t      | Sig. (p) |
|--------------------------------|-----------------------------|------------|---------------------------|--------|----------|
|                                | B                           | Std. Error | Beta                      |        |          |
| (Constant)                     | 1.743                       | 0.217      |                           | 8.046  | < 0.001  |
| Occupation=Urban dweller       | −0.964                      | 0.351      | −0.253                    | −2.747 | 0.007    |
| District=Kars central          | −0.532                      | 0.249      | −0.197                    | −2.138 | 0.035    |
| Time since infection [log10 y] | −0.356                      | 0.169      | −0.194                    | −2.104 | 0.038    |

**Table S7: Characteristics of four individuals with no history of infection, who were identified by discriminant factor analysis as having a >90% probability of having previously had anthrax infection.**

| Subject                           | A            | B            | C              | D             |
|-----------------------------------|--------------|--------------|----------------|---------------|
| Age (y)                           | 29           | 30           | 45             | 74            |
| Gender                            | Male         | Male         | Male           | Male          |
| Residence category                | City         | City         | Village        | Village       |
| Administrative district           | Kars Central | Kars Central | Sarıkamış      | Kars Central  |
| Occupation group                  | Butcher      | Butcher      | Rural dweller  | Rural dweller |
| Time in occupation (y)            | 18           | 10           | 45             | 74            |
| Continuous risk duration (y)      | None         | None         | Yes, not known | None          |
| Time since contact event (y)      | None         | None         | Yes, not known | 5             |
| Anti-PA IgG concentration (µg/ml) | 2.7          | 2.5          | 1.9            | 2.9           |
| Anti-LF IgG concentration (µg/ml) | 2.0          | 1.4          | 2.0            | 1.5           |
